# Supplementary material for: Health professionals’ perceptions of the barriers and facilitators to providing smoking cessation advice to women in pregnancy and during the post-partum period: a systematic review of qualitative research
Source: Springer Nature journal article supplement (doi:10.1186/s12889-016-2961-9), 2016-03-31
Supplement: MOESM1 [file 10026846]

**Additional File 1: Search strategy for Flemming et al "Health professionals' perceptions of the barriers and facilitators to providing smoking cessation advice to women in pregnancy and during the post-partum period: a systematic review of qualitative research". <http://dx.doi.org/10.1186/s12889-016-2961-9>**

**CINAHL**

Searched via EBSCO interface, 26.02.14

Limiters - Published Date: 19900101-20141231; English Language

| #   | Query                                                                                                                                                                                                                                                                                                                                        |
|-----|----------------------------------------------------------------------------------------------------------------------------------------------------------------------------------------------------------------------------------------------------------------------------------------------------------------------------------------------|
| S75 | S74 AND Limiters - Published Date: 19900101-20141231; English Language                                                                                                                                                                                                                                                                       |
| S74 | S4 AND S11 AND S28 AND S73                                                                                                                                                                                                                                                                                                                   |
| S73 | S29 OR S30 OR S31 OR S32 OR S33 OR S34 OR S35 OR S36 OR S37 OR S38 OR S39 OR S40 OR S41 OR S42 OR S43 OR S44 OR S45 OR S46 OR S47 OR S48 OR S49 OR S50 OR S51 OR S52 OR S53 OR S54 OR S55 OR S56 OR S57 OR S58 OR S59 OR S60 OR S61 OR S62 OR S63 OR S64 OR S65 OR S66 OR S67 OR S68 OR S69 OR S70 OR S71 OR S72                             |
| S72 | MH "Patient Education"                                                                                                                                                                                                                                                                                                                       |
| S71 | MH "Research, Midwifery"                                                                                                                                                                                                                                                                                                                     |
| S70 | MH "Practice Patterns"                                                                                                                                                                                                                                                                                                                       |
| S69 | MH "Patient History Taking+"                                                                                                                                                                                                                                                                                                                 |
| S68 | MH "Professional-Patient Relations"                                                                                                                                                                                                                                                                                                          |
| S67 | MH "Professional-Client Relations"                                                                                                                                                                                                                                                                                                           |
| S66 | MH "Professional-Family Relations"                                                                                                                                                                                                                                                                                                           |
| S65 | MH "Physician-Patient Relations"                                                                                                                                                                                                                                                                                                             |
| S64 | MH "Nurse-Patient Relations"                                                                                                                                                                                                                                                                                                                 |
| S63 | MH "Community Role"                                                                                                                                                                                                                                                                                                                          |
| S62 | MH "Professional Role"                                                                                                                                                                                                                                                                                                                       |
| S61 | MH "Physician's Role"                                                                                                                                                                                                                                                                                                                        |
| S60 | MH "Nursing Role"                                                                                                                                                                                                                                                                                                                            |
| S59 | MH "Employee Attitudes"                                                                                                                                                                                                                                                                                                                      |
| S58 | MH "Midwife Attitudes"                                                                                                                                                                                                                                                                                                                       |
| S57 | MH "Attitude of Health Personnel+"<br>TI ((health OR "health care" OR healthcare OR medical OR hospital) N2 (personnel OR worker# OR provider# OR employee# OR staff OR professional#)) OR AB ((health OR "health care" OR healthcare OR medical OR hospital) N2 (personnel OR worker# OR provider# OR employee# OR staff OR professional#)) |
| S56 | (MH "Pharmacists") OR (MH "Pharmacy Technicians") OR (MH "Pharmacy Service+")                                                                                                                                                                                                                                                                |
| S55 | TI (pharmacist# OR pharmacy OR pharmacies) OR AB (pharmacist# OR pharmacy OR pharmacies)                                                                                                                                                                                                                                                     |
| S54 | MH "Allied Health Personnel+"                                                                                                                                                                                                                                                                                                                |
| S53 | MH "Community Health Workers"                                                                                                                                                                                                                                                                                                                |
| S52 | MH "Community Health Nursing"                                                                                                                                                                                                                                                                                                                |
| S51 | MH "Home Health Aides"                                                                                                                                                                                                                                                                                                                       |
| S50 | TI ((home OR health) N2 visit*) OR AB ((home OR health) N2 visit*)                                                                                                                                                                                                                                                                           |
| S49 | MH "Physicians, Family"                                                                                                                                                                                                                                                                                                                      |
| S48 | TI (GP# OR "general practitioner" OR "general practitioners") OR AB (GP# OR "general practitioner" OR "general practitioners")                                                                                                                                                                                                               |
| S47 | TI (doctor# OR physician# OR clinician#) OR AB (doctor# OR physician# OR clinician#)                                                                                                                                                                                                                                                         |
| S46 | TI ((ante-natal OR antenatal) N1 (appointment# OR care OR service#)) OR AB ((ante-natal OR antenatal) N1 (appointment# OR care OR service#))                                                                                                                                                                                                 |
| S45 | TI (maternity N1 (care OR service#)) OR AB (maternity N1 (care OR service#))                                                                                                                                                                                                                                                                 |
| S44 | TI (consultant* N1 (obstetric* OR gyn#ecologic*)) OR AB (consultant* N1 (obstetric* OR gyn#ecologic*))                                                                                                                                                                                                                                       |
| S43 | MH "Obstetrics"                                                                                                                                                                                                                                                                                                                              |
| S42 | TI (nursing N2 (staff OR personnel OR auxiliar*)) OR AB (nursing N2 (staff OR personnel OR auxiliar*))                                                                                                                                                                                                                                       |
| S41 | TI (nurse#) OR AB (nurse#)                                                                                                                                                                                                                                                                                                                   |
| S40 | (MH "Obstetric Nursing") OR (MH "OB-GYN Nurse Practitioners")                                                                                                                                                                                                                                                                                |
| S39 | (MH "Pediatric Nursing") OR (MH "Pediatric Nurse Practitioners")                                                                                                                                                                                                                                                                             |
| S38 | (MH "Family Nursing") OR (MH "Family Nurse Practitioners")                                                                                                                                                                                                                                                                                   |
| S37 | (MH "Family Nursing") OR (MH "Family Nurse Practitioners")                                                                                                                                                                                                                                                                                   |

S36 MH "Maternal-Child Nursing+"  
 S35 MH "Nurse Midwifery"  
 S34 MH "Midwives+"  
 S33 TI (midwi?e\*) OR AB (midwi?e\*)  
 S32 TI ((train\* OR service\* OR support\*) N2 cessation) OR AB ((train\* OR service\* OR support\*) N2 cessation)  
 S31 TI ((train\* OR service\* OR support\*) N2 smoking) OR AB ((train\* OR service\* OR support\*) N2 smoking)  
 S30 TI ((advisor\* OR assist\* OR manager\* OR professional\* OR specialist\*) N2 cessation) OR AB ((advisor\* OR assist\* OR manager\* OR professional\* OR specialist\*) N2 cessation)  
 S29 TI ((advisor\* OR assist\* OR manager\* OR professional\* OR specialist\*) N2 smoking) OR AB ((advisor\* OR assist\* OR manager\* OR professional\* OR specialist\*) N2 smoking)  
 S28 S12 OR S13 OR S14 OR S15 OR S16 OR S17 OR S18 OR S19 OR S20 OR S21 OR S22 OR S23 OR S24 OR S25 OR S26 OR S27  
 S27 TI "expectant mother\*" OR AB "expectant mother\*" (MH "Expectant Mothers")  
 S26 (MH "Expectant Mothers")  
 S25 TI (pregnant or pregnanc\*) OR AB (pregnant or pregnanc\*) (MH "Breast Feeding")  
 S24 (MH "Breast Feeding")  
 S23 (MH "Postnatal Period+")  
 S22 (MH "Infant, Newborn")  
 S21 (MH "Analgesia, Obstetrical")  
 S20 (MH "Labor Pain")  
 S19 (MH "Prenatal Care")  
 S18 (MH "Perinatal Care")  
 S17 (MH "Prenatal Diagnosis+")  
 S16 (MH "Fetal Monitoring+")  
 S15 (MH "Fetus+")  
 S14 (MH "Maternal Health Services+")  
 S13 (MH "Pregnancy Complications+")  
 S12 (MH "Pregnancy+")  
 S11 S5 OR S6 OR S7 OR S8 OR S9 OR S10  
 S10 (MH "Tobacco, Smokeless")  
 S9 (MH "Tobacco")  
 S8 (MH "Nicotine")  
 S7 (MH "Smoking Cessation Programs")  
 S6 (MH "Smoking")  
 S5 TI ((stop\* or quit\* or reduc\* or give up or giving up) N2 (cigarette\* or tobacco or smoking)) OR AB ((stop\* or quit\* or reduc\* or give up or giving up) N2 (cigarette\* or tobacco or smoking))  
 S4 S1 OR S2 OR S3  
 S3 qualitative  
 S2 interview\* or (MH "Interviews+")  
 S1 findings

## PsycINFO

Searched via EBSCO interface, 25.02.14

Limiters - Publication Year: 1990-2014; English Language

| #   | Query                                                                                                                                                                                                                 |
|-----|-----------------------------------------------------------------------------------------------------------------------------------------------------------------------------------------------------------------------|
| S56 | S55 AND Limiters - Publication Year: 1990-2014; English                                                                                                                                                               |
| S55 | S4 AND S10 AND S22 AND S54                                                                                                                                                                                            |
| S54 | S23 OR S24 OR S25 OR S26 OR S27 OR S28 OR S29 OR S30 OR S31 OR S32 OR S33 OR S34 OR S35 OR S36 OR S37 OR S38 OR S39 OR S40 OR S41 OR S42 OR S43 OR S44 OR S45 OR S46 OR S47 OR S48 OR S49 OR S50 OR S51 OR S52 OR S53 |
| S53 | DE "Client Education"                                                                                                                                                                                                 |
| S52 | DE "Health Screening"                                                                                                                                                                                                 |

S51 DE "Professional Identity"

S50 DE "Role Perception"

S49 DE "Health Personnel Attitudes"

S48 DE "Employee Attitudes"

S47 TI ((health OR "health care" OR healthcare OR medical OR hospital) N2 (personnel OR worker# OR provider# OR employee# OR staff OR professional#)) OR AB ((health OR "health care" OR healthcare OR medical OR hospital) N2 (personnel OR worker# OR provider# OR employee# OR staff OR professional#))

S46 DE "Pharmacists"

S45 TI (pharmacist# OR pharmacy OR pharmacies) OR AB (pharmacist# OR pharmacy OR pharmacies)

S44 DE "Allied Health Personnel"

S43 DE "Home Visiting Programs"

S42 DE "Home Care Personnel"

S41 TI ((home OR health) N2 visit\*) OR AB ((home OR health) N2 visit\*)

S40 DE "General Practitioners"

S39 DE "Family Physicians"

S38 TI (GP# OR "general practitioner" OR "general practitioners") OR AB (GP# OR "general practitioner" OR "general practitioners")

S37 TI (doctor# OR physician# OR clinician#) OR AB (doctor# OR physician# OR clinician#)

S36 TI ((ante-natal OR antenatal) N1 (appointment# OR care OR service#)) OR AB ((ante-natal OR antenatal) N1 (appointment# OR care OR service#))

S35 TI (maternity N1 (care OR service#)) OR AB (maternity N1 (care OR service#))

S34 TI (consultant\* N1 (obstetric\* OR gyn#ecologic\*)) OR AB (consultant\* N1 (obstetric\* OR gyn#ecologic\*))

S33 DE "Obstetrics" OR DE "Obstetricians"

S32 TI (nursing N2 (staff OR personnel OR auxiliar\*)) OR AB (nursing N2 (staff OR personnel OR auxiliar\*))

S31 TI (nurse#) OR AB (nurse#)

S30 DE "Public Health Service Nurses"

S29 DE "Nurses"

S28 DE "Midwifery"

S27 TI (midwi?e\*) OR AB (midwi?e\*)

S26 TI ((train\* OR service\* OR support\*) N2 cessation) OR AB ((train\* OR service\* OR support\*) N2 cessation)

S25 TI ((train\* OR service\* OR support\*) N2 smoking) OR AB ((train\* OR service\* OR support\*) N2 smoking)

S24 TI ((advisor\* OR assist\* OR manager\* OR professional\* OR specialist\*) N2 cessation) OR AB ((advisor\* OR assist\* OR manager\* OR professional\* OR specialist\*) N2 cessation)

S23 TI ((advisor\* OR assist\* OR manager\* OR professional\* OR specialist\*) N2 smoking) OR AB ((advisor\* OR assist\* OR manager\* OR professional\* OR specialist\*) N2 smoking)

S22 S11 OR S12 OR S13 OR S14 OR S15 OR S16 OR S17 OR S18 OR S19 OR S20 OR S21

S21 TI "expectant mother\*" OR AB "expectant mother\*"

S20 TI (pregnant or pregnanc\*) OR AB (pregnant or pregnanc\*)

S19 DE "Breast Feeding"

S18 DE "Postnatal Period"

S17 DE "Prenatal Care" OR DE "Childbirth Training"

S16 DE "Perinatal Period"

S15 DE "Prenatal Diagnosis"

S14 DE "Prenatal Exposure"

S13 DE "Fetus"

S12 DE "Obstetrical Complications"  
 S11 DE "Pregnancy" OR DE "Adolescent Pregnancy"  
 S10 S5 OR S6 OR S7 OR S8 OR S9  
 S9 DE "Passive smoking"  
 S8 DE "Smokeless Tobacco"  
 S7 DE "Nicotine"  
 S6 DE "Smoking Cessation"  
 S5 DE "Tobacco Smoking"  
 S4 S1 OR S2 OR S3  
 S3 qualitative  
 S2 interview\* or (DE "Interviews") or (DE "Interviewing")  
 S1 findings

### Medline

Searched via EBSCO interface, 26.02.14

Limiters - Date of Publication: 19900101-20141231; English Language

| #   | Query                                                                                                                                                                                                                                                                                                                                                 |
|-----|-------------------------------------------------------------------------------------------------------------------------------------------------------------------------------------------------------------------------------------------------------------------------------------------------------------------------------------------------------|
| S67 | S66 AND Limiters - Date of Publication: 19900101-20141231; English Language                                                                                                                                                                                                                                                                           |
| S66 | S4 AND S14 AND S26 AND S65<br>S27 OR S28 OR S29 OR S30 OR S31 OR S32 OR S33 OR S34 OR S35 OR S36 OR S37 OR S38 OR S39 OR S40<br>OR S41 OR S42 OR S43 OR S44 OR S45 OR S46 OR S47 OR S48 OR S49 OR S50 OR S51 OR S52 OR S53 OR<br>S54 OR S55 OR S56 OR S57 OR S58 OR S59 OR S60 OR S61 OR S62 OR S63 OR S64                                            |
| S64 | MH "Patient Education as Topic"                                                                                                                                                                                                                                                                                                                       |
| S63 | MH "Nursing Methodology Research"                                                                                                                                                                                                                                                                                                                     |
| S62 | MH "Medical History Taking"                                                                                                                                                                                                                                                                                                                           |
| S61 | MH "Physician's Practice Patterns"                                                                                                                                                                                                                                                                                                                    |
| S60 | MH "Physician-Patient Relations"                                                                                                                                                                                                                                                                                                                      |
| S59 | MH "Nurse-Patient Relations"                                                                                                                                                                                                                                                                                                                          |
| S58 | MH "Physician's Role"                                                                                                                                                                                                                                                                                                                                 |
| S57 | MH "Nurse's Role"                                                                                                                                                                                                                                                                                                                                     |
| S56 | MH "Attitude of Health Personnel"<br>TI ((health OR "health care" OR healthcare OR medical OR hospital) N2 (personnel OR worker# OR<br>S55 provider# OR employee# OR staff OR professional#)) OR AB ((health OR "health care" OR healthcare OR<br>medical OR hospital) N2 (personnel OR worker# OR provider# OR employee# OR staff OR professional#)) |
| S54 | (MH "Pharmacists") OR (MH "Pharmacists' Aides") OR (MH "Pharmaceutical Services+")                                                                                                                                                                                                                                                                    |
| S53 | TI (pharmacist# OR pharmacy OR pharmacies) OR AB (pharmacist# OR pharmacy OR pharmacies)                                                                                                                                                                                                                                                              |
| S52 | MH "Allied Health Personnel"                                                                                                                                                                                                                                                                                                                          |
| S51 | MH "Community Health Workers"                                                                                                                                                                                                                                                                                                                         |
| S50 | (MH "Community Health Nursing+") OR (MH "Nurses, Community Health")                                                                                                                                                                                                                                                                                   |
| S49 | MH "Home Health Aides"                                                                                                                                                                                                                                                                                                                                |
| S48 | TI ((home OR health) N2 visit*) OR AB ((home OR health) N2 visit*)                                                                                                                                                                                                                                                                                    |
| S47 | MH "Physicians, Family"                                                                                                                                                                                                                                                                                                                               |
| S46 | MH "General Practitioners"                                                                                                                                                                                                                                                                                                                            |

S45 TI (GP# OR "general practitioner" OR "general practitioners") OR AB (GP# OR "general practitioner" OR "general practitioners")

S44 TI (doctor# OR physician# OR clinician#) OR AB (doctor# OR physician# OR clinician#)

S43 TI ((ante-natal OR antenatal) N1 (appointment# OR care OR service#)) OR AB ((ante-natal OR antenatal) N1 (appointment# OR care OR service#))

S42 TI (maternity N1 (care OR service#)) OR AB (maternity N1 (care OR service#))

S41 TI (consultant\* N1 (obstetric\* OR gyn#ecologic\*)) OR AB (consultant\* N1 (obstetric\* OR gyn#ecologic\*))

S40 MH "Obstetrics"

S39 TI (nursing N2 (staff OR personnel OR auxiliar\*)) OR AB (nursing N2 (staff OR personnel OR auxiliar\*))

S38 TI (nurse#) OR AB (nurse#)

S37 MH "Obstetric Nursing"

S36 (MH "Public Health Nursing") OR (MH "Nurses, Public Health")

S35 (MH "Pediatric Nursing") OR (MH "Pediatric Nurse Practitioners")

S34 (MH "Family Nursing") OR (MH "Family Nurse Practitioners")

S33 MH "Maternal-Child Nursing"

S32 (MH "Midwifery") OR (MH "Nurse Midwives")

S31 TI (midwi?e\*) OR AB (midwi?e\*)

S30 TI ((train\* OR service\* OR support\*) N2 cessation) OR AB ((train\* OR service\* OR support\*) N2 cessation)

S29 TI ((train\* OR service\* OR support\*) N2 smoking) OR AB ((train\* OR service\* OR support\*) N2 smoking)

S28 TI ((advisor\* OR assist\* OR manager\* OR professional\* OR specialist\*) N2 cessation) OR AB ((advisor\* OR assist\* OR manager\* OR professional\* OR specialist\*) N2 cessation)

S27 TI ((advisor\* OR assist\* OR manager\* OR professional\* OR specialist\*) N2 smoking) OR AB ((advisor\* OR assist\* OR manager\* OR professional\* OR specialist\*) N2 smoking)

S26 S15 OR S16 OR S17 OR S18 OR S19 OR S20 OR S21 OR S22 OR S23 OR S24 OR S25

S25 TI "expectant mother\*" OR AB "expectant mother\*"

S24 MH "Pregnant Women"

S23 TI (pregnant or pregnanc\*) OR AB (pregnant or pregnanc\*)

S22 MH "Maternal Health Services+"

S21 MH "Breast Feeding"

S20 MH "Postpartum Period+"

S19 MH "Prenatal Care"

S18 MH "Perinatal Care"

S17 MH "Prenatal Diagnosis+"

S16 MH "Infant, Newborn"

S15 MH "Pregnancy+"

S14 S5 OR S6 OR S7 OR S8 OR S9 OR S10 OR S11 OR S12 OR S13

S13 MH "Tobacco Smoke Pollution"

S12 MH "Tobacco, Smokeless"

S11 MH "Nicotine"

S10 MH "Smoking Cessation"

S9 MH "Tobacco Use Cessation"

S8 MH "Tobacco Use Disorder"

S7 TI ((stop\* or quit\* or reduc\* or give up or giving up) N2 (cigarette\* or tobacco or smoking)) OR AB ((stop\* or quit\* or reduc\* or give up or giving up) N2 (cigarette\* or tobacco or smoking))

S6 MH "Tobacco"

- S5 MH "Smoking"
- S4 S1 OR S2 OR S3
- S3 qualitative
- S2 interview\* or MH "Interview"
- S1 findings

### Social Sciences Citation Index (SSCI)

Searched via Web of Knowledge interface, 25.02.14

Databases=SSCI; Timespan=1990-2014; Language=(English)

- #21 (#19 AND #3 AND #2 AND #1) AND LANGUAGE: (English)
- #20 (#19 AND #3 AND #2 AND #1)
- #19 #18 OR #17 OR #16 OR #15 OR #14 OR #13 OR #12 OR #11 OR #10 OR #9 OR #8 OR #7 OR #6 OR #5 OR #4
- #18 TS=((health OR "health care" OR healthcare OR medical OR hospital) NEAR/2 (personnel OR worker\$ OR provider\$ OR employee\$ OR staff OR professional\$))
- #17 TS=(pharmacist\$ OR pharmacy OR pharmacies)
- #16 TS=((home OR health) NEAR/2 visit\*)
- #15 TS=(GP\$ OR "general practitioner" OR "general practitioners")
- #14 TS=(doctor\$ OR physician\$ OR clinician\$)
- #13 TS=((ante-natal OR antenatal) NEAR/1 (appointment\$ OR care OR service\$))
- #12 TS=(maternity NEAR/1 (care OR service\$))
- #11 TS=(consultant\* NEAR/1 (obstetric\* OR gyn\$ecologic\*))
- #10 TS=(nursing NEAR/2 (staff OR personnel OR auxiliar\*))
- #9 TS=(nurse\$)
- #8 TS=(midwi?e\*)
- #7 TS=((train\* OR service\* OR support\*) NEAR/2 cessation)
- #6 TS=((train\* OR service\* OR support\*) NEAR/2 smoking)
- #5 TS=((advisor\* OR assist\* OR manager\* OR professional\* OR specialist\*) NEAR/2 cessation)
- #4 TS=((advisor\* OR assist\* OR manager\* OR professional\* OR specialist\*) NEAR/2 smoking)
- #3 TS=(pregnant or pregnanc\* or "expectant mother\*")
- #2 TS=(cigarette\* or tobacco or smok\* or nicotine)
- #1 TS=(qualitativ\* or finding\* or interview\*)

### The Economic and Social Research Council (ESRC)

Searched via <http://www.esrc.ac.uk/search/advanced-search.aspx>, 26.02.14

(The ESRC website's advanced search engine is configured to use the Porter Stemming plugin which reduces search words down to their base word.)

|                                 | <b>AND</b> |                                           |
|---------------------------------|------------|-------------------------------------------|
| <b>All of these words:</b>      |            | <b>Any of these words:</b>                |
| 1. qualitative pregnant         |            | cigarette tobacco smoker smoking nicotine |
| 2. interview pregnant           |            | cigarette tobacco smoker smoking nicotine |
| 3. finding pregnant             |            | cigarette tobacco smoker smoking nicotine |
| 4. qualitative pregnancy        |            | cigarette tobacco smoker smoking nicotine |
| 5. interview pregnancy          |            | cigarette tobacco smoker smoking nicotine |
| 6. finding pregnancy            |            | cigarette tobacco smoker smoking nicotine |
| 7. qualitative expectant        |            | cigarette tobacco smoker smoking nicotine |
| 8. interview expectant          |            | cigarette tobacco smoker smoking nicotine |
| 9. finding expectant            |            | cigarette tobacco smoker smoking nicotine |
| 10. qualitative <i>midwife</i>  |            | cigarette tobacco smoker smoking nicotine |
| 11. interview <i>midwife</i>    |            | cigarette tobacco smoker smoking nicotine |
| 12. finding <i>midwife</i>      |            | cigarette tobacco smoker smoking nicotine |
| 13. qualitative <i>midwives</i> |            | cigarette tobacco smoker smoking nicotine |
| 14. interview <i>midwives</i>   |            | cigarette tobacco smoker smoking nicotine |

- |     |                                 |                                           |
|-----|---------------------------------|-------------------------------------------|
| 15. | finding <i>midwives</i>         | cigarette tobacco smoker smoking nicotine |
| 16. | qualitative <i>nurse</i>        | cigarette tobacco smoker smoking nicotine |
| 17. | interview <i>nurse</i>          | cigarette tobacco smoker smoking nicotine |
| 18. | finding <i>nurse</i>            | cigarette tobacco smoker smoking nicotine |
| 19. | qualitative <i>professional</i> | cigarette tobacco smoker smoking nicotine |
| 20. | interview <i>professional</i>   | cigarette tobacco smoker smoking nicotine |
| 21. | finding <i>professional</i>     | cigarette tobacco smoker smoking nicotine |
| 22. | qualitative <i>advisor</i>      | cigarette tobacco smoker smoking nicotine |
| 23. | interview <i>advisor</i>        | cigarette tobacco smoker smoking nicotine |
| 24. | finding <i>advisor</i>          | cigarette tobacco smoker smoking nicotine |
| 25. | qualitative <i>GP</i>           | cigarette tobacco smoker smoking nicotine |
| 26. | interview <i>GP</i>             | cigarette tobacco smoker smoking nicotine |
| 27. | finding <i>GP</i>               | cigarette tobacco smoker smoking nicotine |

### PubMed (including Medline)

Searched via NCBI interface, 28.02.14

Limited to Ahead of Print Citations and articles published in the last 3 months.

#### Search Query

- |    |                                                                                                                                                                                                                                                                                                                                                                                                                                                                                                                                  |
|----|----------------------------------------------------------------------------------------------------------------------------------------------------------------------------------------------------------------------------------------------------------------------------------------------------------------------------------------------------------------------------------------------------------------------------------------------------------------------------------------------------------------------------------|
| #7 | #5 OR #6                                                                                                                                                                                                                                                                                                                                                                                                                                                                                                                         |
| #6 | #4 AND (2013/12:2014 [edat] OR 2013/11:2014 [crdt] OR 2013/12:2014[dp])                                                                                                                                                                                                                                                                                                                                                                                                                                                          |
| #5 | #4 AND pubstatusaheadofprint                                                                                                                                                                                                                                                                                                                                                                                                                                                                                                     |
| #4 | #1 AND #2 AND #3                                                                                                                                                                                                                                                                                                                                                                                                                                                                                                                 |
| #3 | "Pregnant Women"[mesh] OR "Breast Feeding"[mesh] OR "Postpartum Period"[mesh] OR "Infant, Newborn"[mesh] OR "Obstetric Surgical Procedures"[mesh] OR "Analgesia, Obstetrical"[mesh] OR "Labor Pain"[mesh] OR "Prenatal Care"[mesh] OR "Perinatal Care"[mesh] OR "Prenatal Diagnosis"[mesh] OR "Fetal Therapies"[mesh] OR "Fetal Monitoring"[mesh] OR "Fetus"[mesh] OR "Maternal Health Services"[mesh] OR "Pregnancy Complications"[mesh] OR "Pregnancy"[mesh] OR pregnant[tiab] OR pregnanc*[tiab] OR "expectant mother*"[tiab] |
| #2 | "Tobacco Smoke Pollution"[mesh] OR "Tobacco, Smokeless"[mesh] OR "Tobacco"[mesh] OR "Nicotine"[mesh] OR "Tobacco Use Disorder"[mesh] OR "Tobacco Use Cessation"[mesh] OR "Smoking Cessation"[mesh] OR "Smoking"[mesh] OR ((stop*[tiab] OR quit*[tiab] OR reduce*[tiab] OR reduct*[tiab] OR "give up" [tiab] OR "giving up" [tiab]) AND (cigarette*[tiab] OR tobacco[tiab] OR smoking[tiab]))                                                                                                                                     |
| #1 | findings OR qualitative OR interview* OR "Interviews as Topic"[mesh] OR "Interview, Psychological"[mesh]                                                                                                                                                                                                                                                                                                                                                                                                                         |

### Google Scholar

Searched via <http://scholar.google.co.uk>, 28.02.14

Limited to English language pages only and 2014 to capture 'ahead of print' but 'published online' articles excluding patents; cookies deleted between searches.

#### All of these words:

qualitative pregnant  
interview pregnancy  
qualitative "expectant"  
interview "expectant"

#### This exact phrase:

published online  
published online  
published online  
published online

#### Any of these words:

cigarette tobacco smoker smoking nicotine  
cigarette tobacco smoker smoking nicotine  
cigarette tobacco smoker smoking nicotine  
cigarette tobacco smoker smoking nicotine
